# Supplementary material
Source: publisher site journal article supplement (https://www.dovepress.com/article/534553)
Supplement: Supplementary file 1 [file 534553%20Revised%20Supplementary%20Material%201.pdf]

## Literature retrieval strategy

### 1. PubMed

(((((("Hip Fractures"[Mesh]) OR (hip fracture\*[Title/Abstract] OR femoral neck fracture\*[Title/Abstract] OR intertrochanteric fracture\*[Title/Abstract] OR subtrochanteric fracture\*[Title/Abstract])) AND (("Aged"[Mesh:NoExp] OR "Aged, 80 and over"[Mesh]) OR (elderly[Title/Abstract] OR geriatric[Title/Abstract] OR (older[Title/Abstract] AND (adult\*[Title/Abstract] OR people[Title/Abstract] OR patient\*[Title/Abstract])) OR senior\*[Title/Abstract] OR "aged"[Title/Abstract] OR "65 and over"[Title/Abstract] OR " ≥ 65"[Title/Abstract]))) AND (((("Nutritional Status"[Mesh] OR "Malnutrition"[Mesh] OR "Nutrition Therapy"[Mesh]) OR (nutrition\*[Title/Abstract] OR malnutrit\*[Title/Abstract] OR undernutrit\*[Title/Abstract] OR "nutritional risk"[Title/Abstract] OR "nutritional assessment"[Title/Abstract] OR "nutritional support"[Title/Abstract] OR "nutritional intervention\*"[Title/Abstract] OR "dietary supplement\*"[Title/Abstract] OR "oral nutritional supplement\*"[Title/Abstract] OR ONS[Title/Abstract] OR "enteral nutrition"[Title/Abstract] OR "parenteral nutrition"[Title/Abstract]))) AND (("Practice Guideline"[Publication Type] OR "Consensus Development Conference"[Publication Type] OR "Systematic Review"[Publication Type] OR "Meta-Analysis"[Publication Type] OR "Review"[Publication Type] OR ("best practice"[Title/Abstract] OR "evidence summary"[Title/Abstract] OR "clinical pathway"[Title/Abstract] OR "care pathway"[Title/Abstract] OR "management pathway"[Title/Abstract])))

AND ("2014/01/01"[Date - Publication] : "2024/03/31"[Date - Publication])

89

### 2. Embase

((('hip fracture'/exp OR 'hip fracture\*':ab,ti OR 'femoral neck fracture\*':ab,ti OR 'intertrochanteric fracture\*':ab,ti OR 'subtrochanteric fracture\*':ab,ti)

AND

('aged'/exp OR 'very elderly'/exp OR elderly:ab,ti OR geriatric:ab,ti OR (older:ab,ti AND (adult\*:ab,ti OR people:ab,ti OR patient\*:ab,ti)) OR senior\*:ab,ti OR aged:ab,ti OR '65 and over':ab,ti OR '≥65':ab,ti)

AND

('perioperative period'/exp OR 'perioperative care'/exp OR perioperat\*:ab,ti OR preoperat\*:ab,ti OR pre-operat\*:ab,ti OR postoperat\*:ab,ti OR post-operat\*:ab,ti OR intraoperat\*:ab,ti OR intra-operat\*:ab,ti)

AND

('nutritional status'/exp OR 'malnutrition'/exp OR 'nutrition therapy'/exp OR nutrition\*:ab,ti OR malnutrit\*:ab,ti OR undernutrit\*:ab,ti OR 'nutritional risk':ab,ti OR 'nutritional assessment':ab,ti OR 'nutritional support':ab,ti OR 'nutritional intervention\*':ab,ti OR 'dietary supplement\*':ab,ti OR 'oral nutritional supplement\*':ab,ti OR ons:ab,ti OR 'enteral nutrition':ab,ti OR 'parenteral nutrition':ab,ti)

AND

'systematic review':ab,ti OR 'meta analysis':ab,ti OR 'guideline':ab,ti OR 'consensus':ab,ti OR 'best practice':ab,ti OR 'evidence summary':ab,ti OR 'clinical pathway':ab,ti OR 'care pathway':ab,ti OR 'management pathway':ab,ti

AND (2014:py OR 2015:py OR 2016:py OR 2017:py OR 2018:py OR 2019:py OR 2020:py OR 2021:py OR 2022:py OR 2023:py OR 2024:py)

## 3. Cochrane Library

#1 MeSH descriptor: [Hip Fractures] explode all trees

#2 (hip fracture\* or femoral neck fracture\* or intertrochanteric fracture\* or subtrochanteric fracture\*):ti,ab,kw

#3 #1 or #2

#4 MeSH descriptor: [Aged] in all MeSH products

#5 (elderly or geriatric or (older NEAR/3 (adult\* or people or patient\*)) or senior\* or aged or "65 and over" or "≥65"):ti,ab,kw

#6 #4 or #5

#7 MeSH descriptor: [Nutritional Status] explode all trees

#8 MeSH descriptor: [Malnutrition] explode all trees

#9 MeSH descriptor: [Nutrition Therapy] explode all trees

#10 (nutrition or malnutrition or undernutrition or "nutritional risk" or "nutritional assessment" or "nutritional support" or "nutritional intervention" or "dietary supplement" or "oral nutritional supplement" or ONS or "enteral nutrition" or "parenteral nutrition"):ti,ab,kw

#11 #7 or #8 or #9 or #10

#12 Custom Range: 01/01/2014-31/03/2024

#13 #11 AND #12

278

## 4. Web of Science

TS=((hip fracture\* OR femoral neck fracture\* OR intertrochanteric fracture\* OR subtrochanteric fracture\*))

AND (elderly OR geriatric OR (older NEAR/2 (adult\* OR people OR patient\*)) OR senior\* OR aged OR "65 and over" OR "≥65")

AND (nutrition\* OR malnutrit\* OR undernutrit\* OR "nutritional risk" OR "nutritional assessment" OR "nutritional support" OR "nutritional intervention\*" OR "dietary supplement\*" OR "oral nutritional supplement\*" OR ONS OR "enteral nutrition" OR "parenteral nutrition")

AND (guideline\* OR consensus OR "systematic review" OR "meta-analysis" OR "best practice" OR "evidence summary" OR "clinical pathway" OR "care pathway" OR "management pathway"))

Refined by:

PUBLICATION YEARS: (2024 OR 2023 OR 2022 OR 2021 OR 2020 OR 2019 OR 2018 OR 2017 OR 2016 OR 2015 OR 2014)

Refined by:

Languages:English or Chinese

496

## 5. CINAHL

(MH "Hip Fractures+" OR TI (hip fracture\* OR femoral neck fracture\* OR intertrochanteric fracture\* OR subtrochanteric fracture\*) OR AB (hip fracture\* OR femoral neck fracture\* OR intertrochanteric fracture\* OR subtrochanteric fracture\*))

AND

(MH "Aged+" OR MH "Frailty Elderly" OR TI (elderly OR geriatric OR (older N2 (adult\* OR people OR patient\*)) OR senior\* OR aged OR "65 and over" OR "≥65") OR AB (elderly OR geriatric OR (older N2 (adult\* OR people OR patient\*)) OR senior\* OR aged OR "65 and over"

OR "≥65"))

AND

(MH "Nutritional Status+" OR MH "Malnutrition+" OR MH "Nutrition Therapy+" OR TI (nutrition\* OR malnutrit\* OR undernutrit\* OR "nutritional risk" OR "nutritional assessment" OR "nutritional support" OR "nutritional intervention\*" OR "dietary supplement\*" OR "oral nutritional supplement\*" OR ONS OR "enteral nutrition" OR "parenteral nutrition") OR AB (nutrition\* OR malnutrit\* OR undernutrit\* OR "nutritional risk" OR "nutritional assessment" OR "nutritional support" OR "nutritional intervention\*" OR "dietary supplement\*" OR "oral nutritional supplement\*" OR ONS OR "enteral nutrition" OR "parenteral nutrition"))

AND

(MH "Systematic Review" OR MH "Meta Analysis" OR MH "Practice Guidelines" OR MH "Consensus Development" OR TI (guideline\* OR consensus OR "best practice" OR "evidence summary" OR "clinical pathway" OR "care pathway" OR "management pathway") OR AB (guideline\* OR consensus OR "best practice" OR "evidence summary" OR "clinical pathway" OR "care pathway" OR "management pathway"))

62

#### 6. CNKI

(篇关摘:髌部骨折(精确)) OR (篇关摘:髌骨折(精确)) OR (篇关摘:股骨颈骨折(精确)) OR (篇关摘:转子间骨折(精确)) OR (篇关摘:转子下骨折(精确)) OR (篇关摘:骨折(精确)) OR (篇关摘:骨科(精确)) OR (篇关摘:老年(精确)) OR (篇关摘:高龄(精确)) OR (篇关摘:65岁(精确)) AND (篇关摘:营养(精确)) OR (篇关摘:膳食补充(精确)) OR (篇关摘:口服营养补充(精确)) OR (篇关摘:营养风险(精确)) OR (篇关摘:营养评估(精确)) OR (篇关摘:营养不良(精确)) OR (篇关摘:营养干预(精确)) OR (篇关摘:营养管理(精确)) OR (篇关摘:营养支持(精确)) AND (篇关摘:证据总结(精确)) OR (篇关摘:共识(精确)) OR (篇关摘:指南(精确)) OR (篇关摘:系统评价(精确)) OR (篇关摘:meta分析(精确)) OR (篇关摘:最佳实践(精确)) OR (篇关摘:临床路径(精确)) OR (篇关摘:护理路径(精确)) OR (篇关摘:管理路径(精确)) OR (篇关摘:最佳实践(精确)) AND 发表时间: 2024.1.1-2024.3.31 AND 研究类型: 研究论文 NOT 会议论文

404

#### 7. Wanfang Data

主题:("髌骨折" OR "股骨颈骨折" OR "转子间骨折" OR "转子下骨折" OR "骨折" OR "骨科") AND 主题:("营养风险" OR "营养不良" OR "营养评估" OR "营养支持" OR "营养干预" OR "膳食补充" OR "口服营养补充" OR "肠内营养" OR "肠外营养" OR "营养") AND 主题:("指南" OR "共识" OR "系统评价" OR "Meta分析" OR "证据总结" OR "最佳实践" OR "临床路径" OR "护理路径" OR "管理路径") AND 年份: 2014-2024 AND

154

#### 8. CBM

(主题词="指南" OR "Meta分析" OR "系统评价" OR "证据总结" OR "专家共识" OR "最佳实践" OR "循证实践" OR "临床路径" OR "管理路径" OR "护理路径" OR "诊疗路径") AND (主题词="营养" OR "营养不良" OR "营养评估" OR "营养支持" OR "营养干预" OR "膳食补充" OR "口服营养补充" OR "肠内营养" OR "肠外营养") AND (主题词="髌骨折" OR "股骨颈骨折" OR "转子间骨折" OR "转子下骨折" OR "骨折" OR "骨科" OR "老年" OR "高龄" OR "65岁") AND 2014-2024 NOT 文献类型: 综述、临床试验、随机对照试验、病例报告

175

#### 9. VIP

(腕部骨折 OR 股骨颈骨折 OR 股骨转子间骨折 OR 髌骨骨折 OR 骨折 OR 骨科 OR 老年 OR 高龄 OR ≥65 岁 OR 65 岁以上) AND (营养风险 OR 营养不良 OR 营养评估 OR 营养支持 OR 营养干预 OR 营养管理 OR 膳食补充 OR 口服营养补充 OR 营养) AND (临床路径 OR 管理路径 OR 诊疗路径 OR 护理路径 OR 循证实践 OR 指南 OR 证据总结 OR 专家共识 OR 证据总结 OR 最佳实践 OR 系统评价 OR meta 分析)  
年份：2014-2024

114

#### 10. ASPEN/ESPEN/CSPEN

American Society for Parenteral and Enteral Nutrition (ASPEN)<https://www.nutritioncare.org>

European Society for Clinical Nutrition and Metabolism (ESPEN) <https://www.espen.org>

Chinese Society for Parenteral and Enteral Nutrition (CSPEN) <http://www.cspen.org>

Hip fracture

11.Uptodate

Hip fracture

12. Joanna Briggs Institute (JBI) Evidence-Based Healthcare Database

Hip fracture
